# Supplementary material
Source: MDPI journal article supplement (https://www.mdpi.com/2673-4605/6/1/20)
Supplement: s1 [file s1]

# Characterization of Zinc Phosphate Coatings: Influence of the pH and temperature in morphology and corrosion resistance

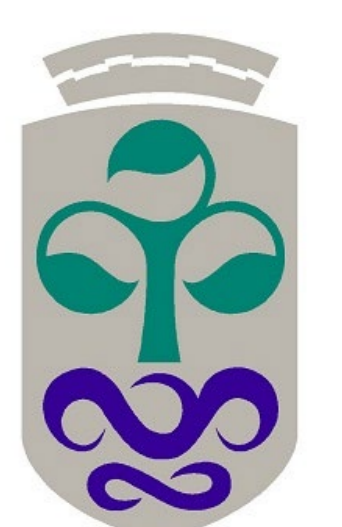

UNIVERSIDADE DE VIGO

Sheila Silva-Fernández, Belén Díaz and X. Ramón Nóvoa

CINTECX, Universidad de Vigo, ENCOMAT group, Campus universitario As Lagoas Marcosende, 36310 Vigo, Spain, belenchi@vigo.es, rnovo@uvigo.es

\*Correspondence: shsilva@uvigo.es

## 1. INTRODUCTION

Zinc phosphate coatings are commonly used to improve the corrosion protection of steel rods. The pH value and the temperature of the bath are important parameters for improving the phosphates' properties. The large variety of bath conditions allows obtaining coatings within different properties and characteristics that can cover a large range of applications. In this work, temperatures in the range 50-75 °C and pH values between 2.4 and 3 are studied.

The coating weight was obtained by measuring the weight loss after immersion for 5 min at 70 °C in solution with Na<sub>4</sub>EDTA 12 %, NaOH 9 %, and TEA 4 %. The surface morphology and composition were investigated via scanning electron microscopy (SEM) and energy-dispersive X-ray (EDX). Corrosion resistance was evaluated with the electrochemical impedance spectroscopy (EIS) and voltammetry (LSV) techniques. The electrolyte was 0.1 M Na<sub>2</sub>SO<sub>4</sub> solution.

### 1.1 Substrate

Hot-rolled high-strength steel bars, 11 mm diameter, ≈ 20 mm long

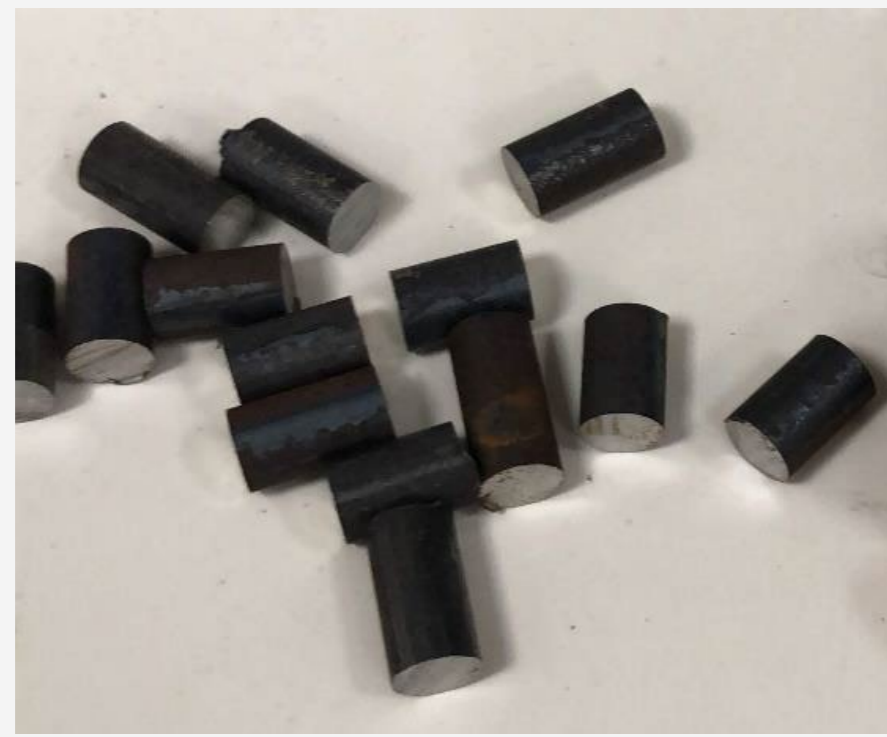

### 1.2 Experimental method

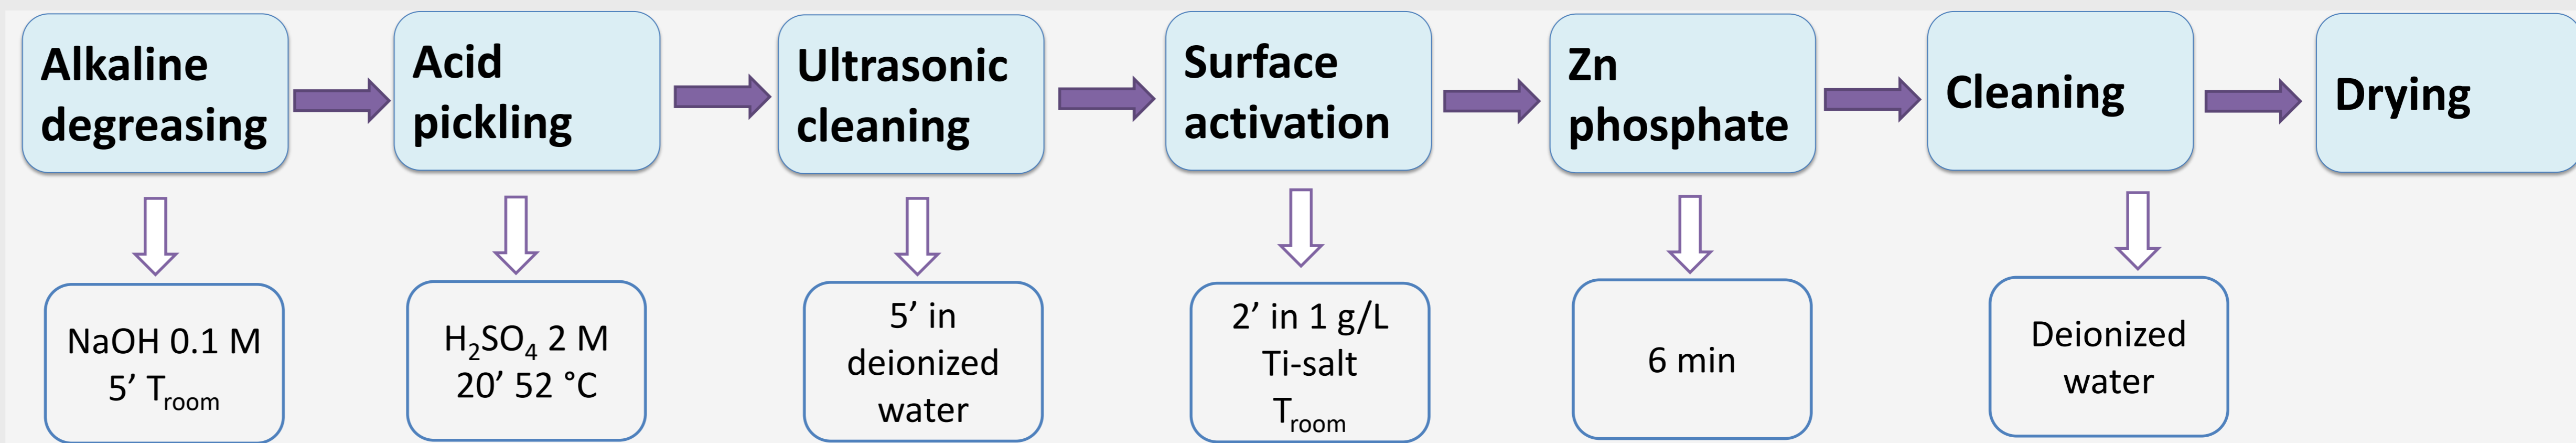

## 2. RESULTS

### Influence of the pH and temperature on mass and film porosity

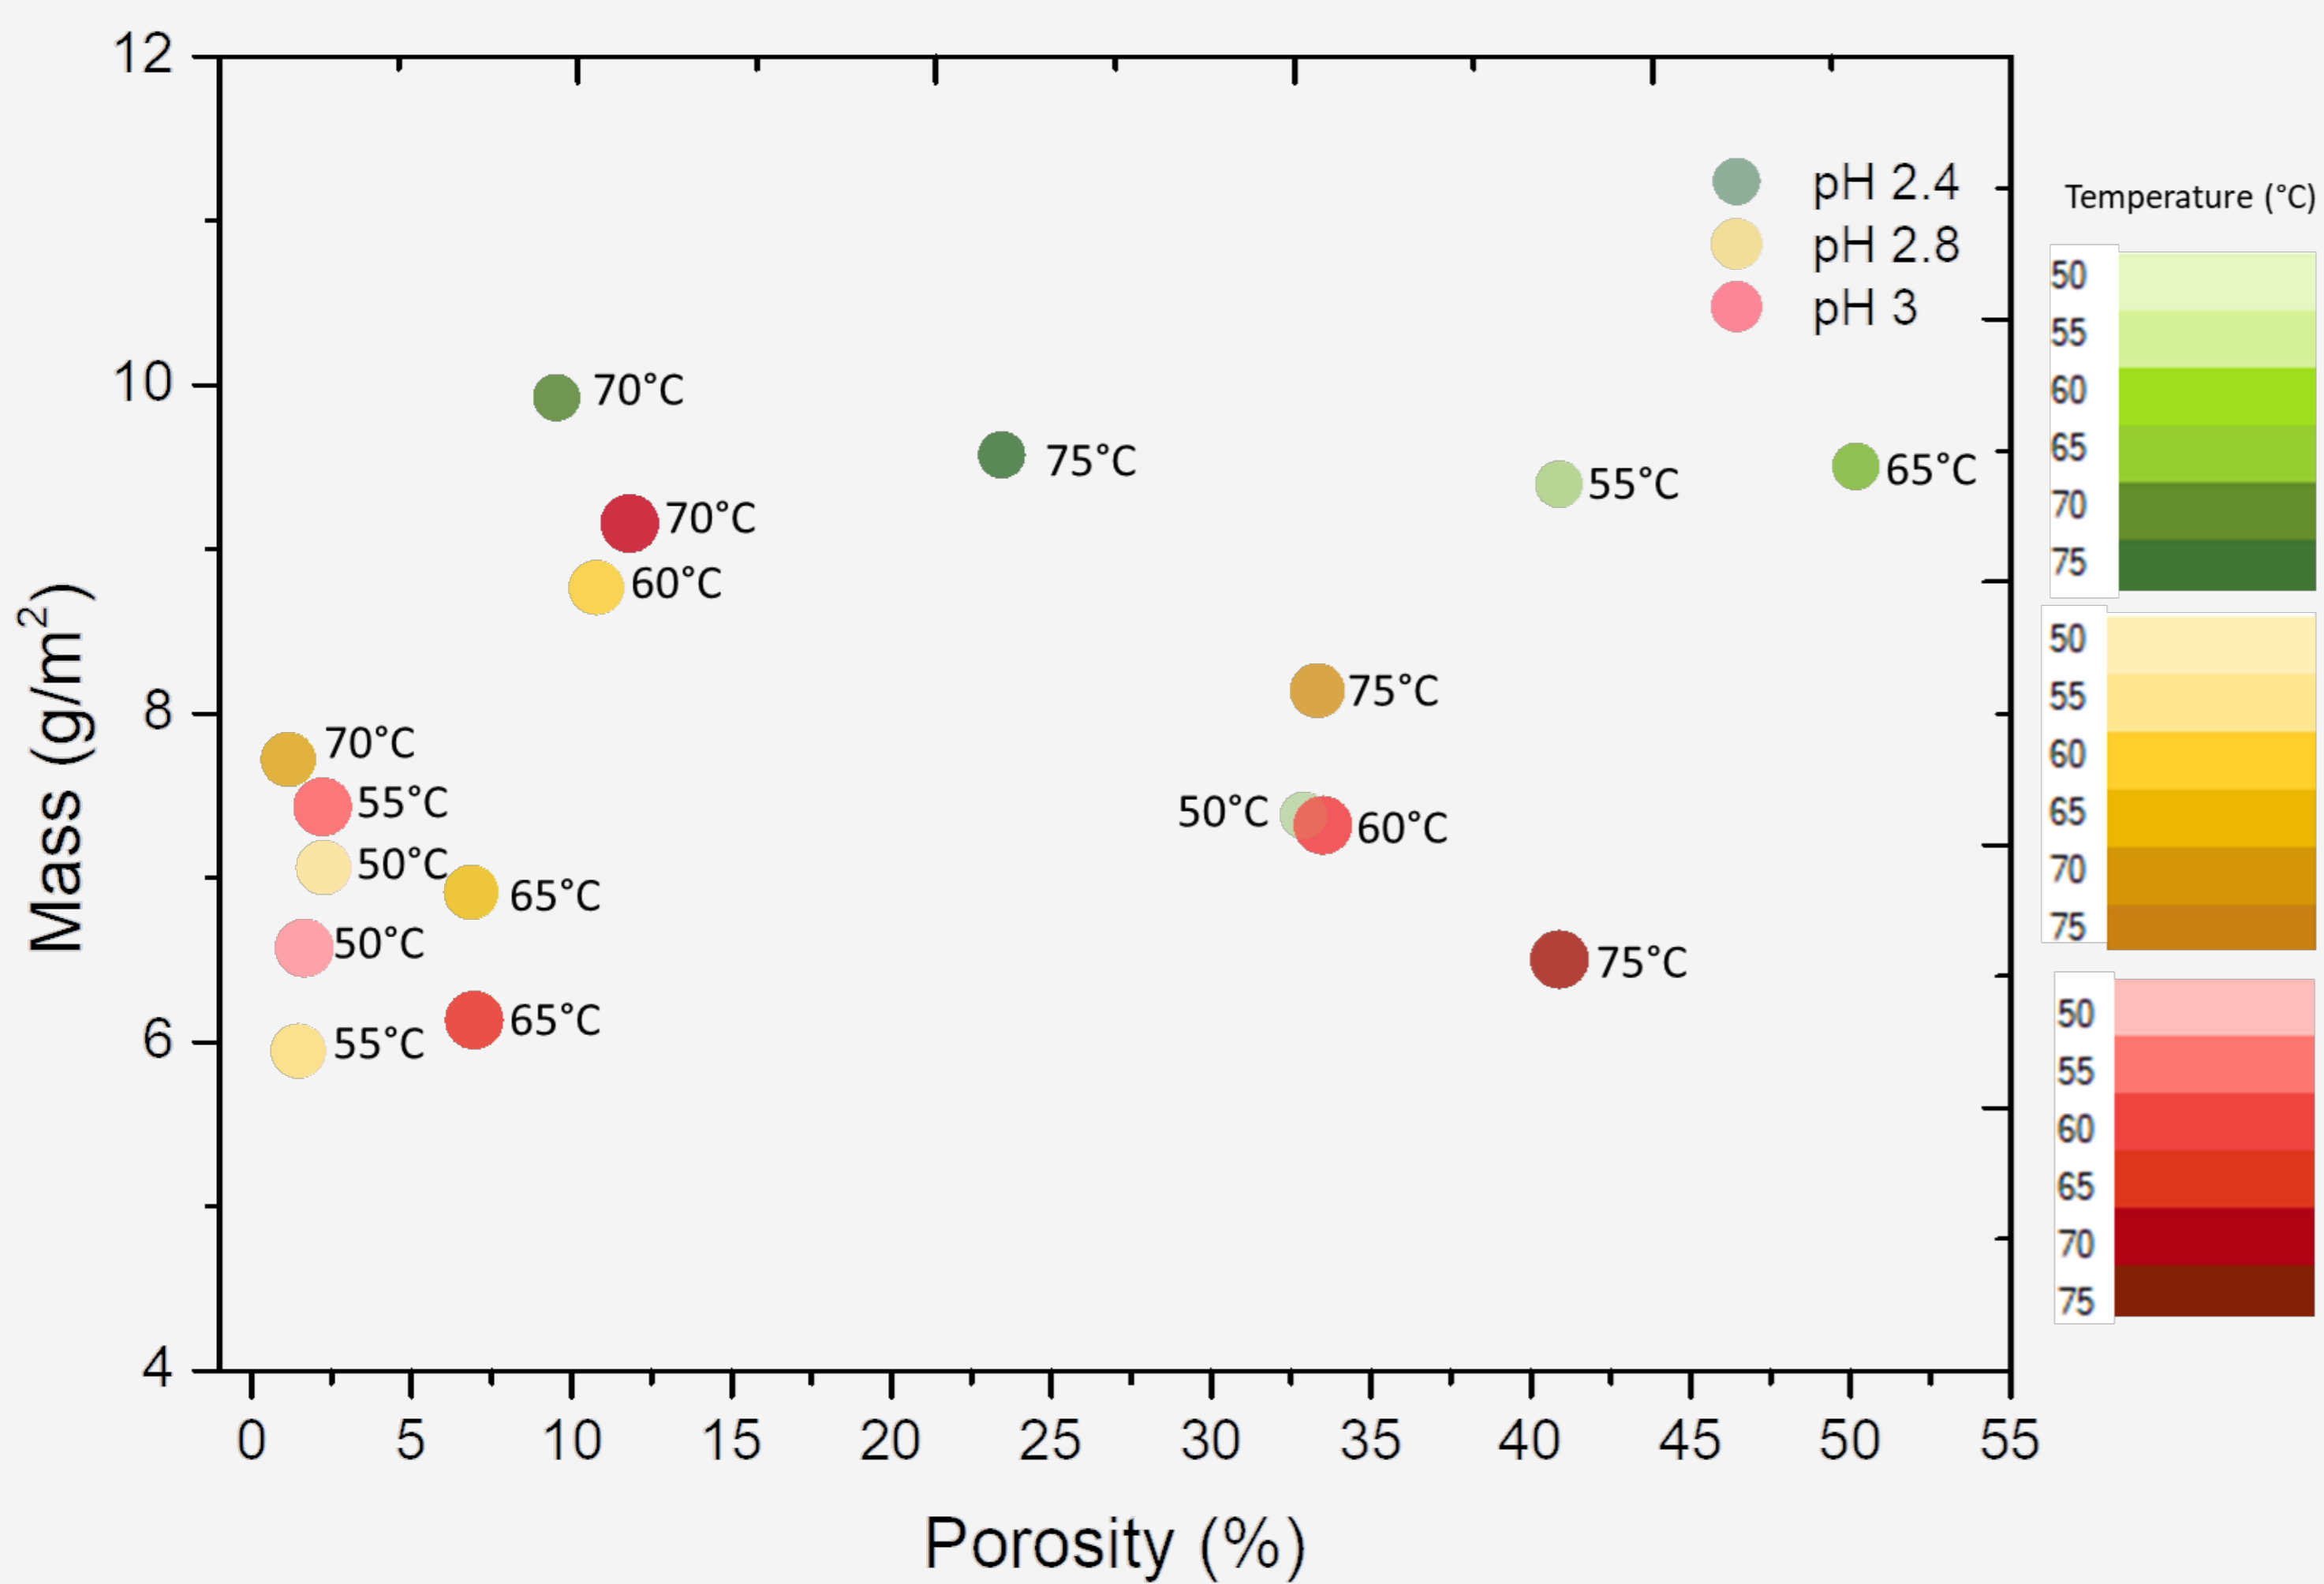

Phosphating bath composition (for 1 L)

| H <sub>3</sub> PO <sub>4</sub> (85 wt. %) | ZnO   | NaNO <sub>3</sub> | NaNO <sub>2</sub> |
|-------------------------------------------|-------|-------------------|-------------------|
| 8.6 mL                                    | 3.5 g | 3 g               | 0.1 g             |

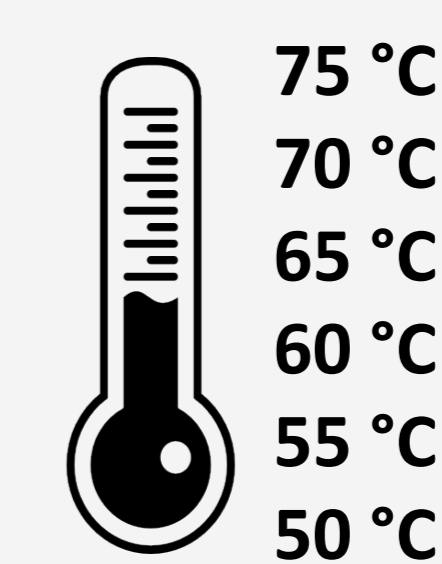

pH 2.4  
pH 2.8  
pH 3

pH adjusted with NaOH 1 M

- The lower the pH, the higher the coating weight
- In general, higher pH values lead to lower porosity values

$$\% \text{ Porosity} = \frac{i_{\text{corr phosphated}}}{i_{\text{corr uncovered}}} \cdot 100$$

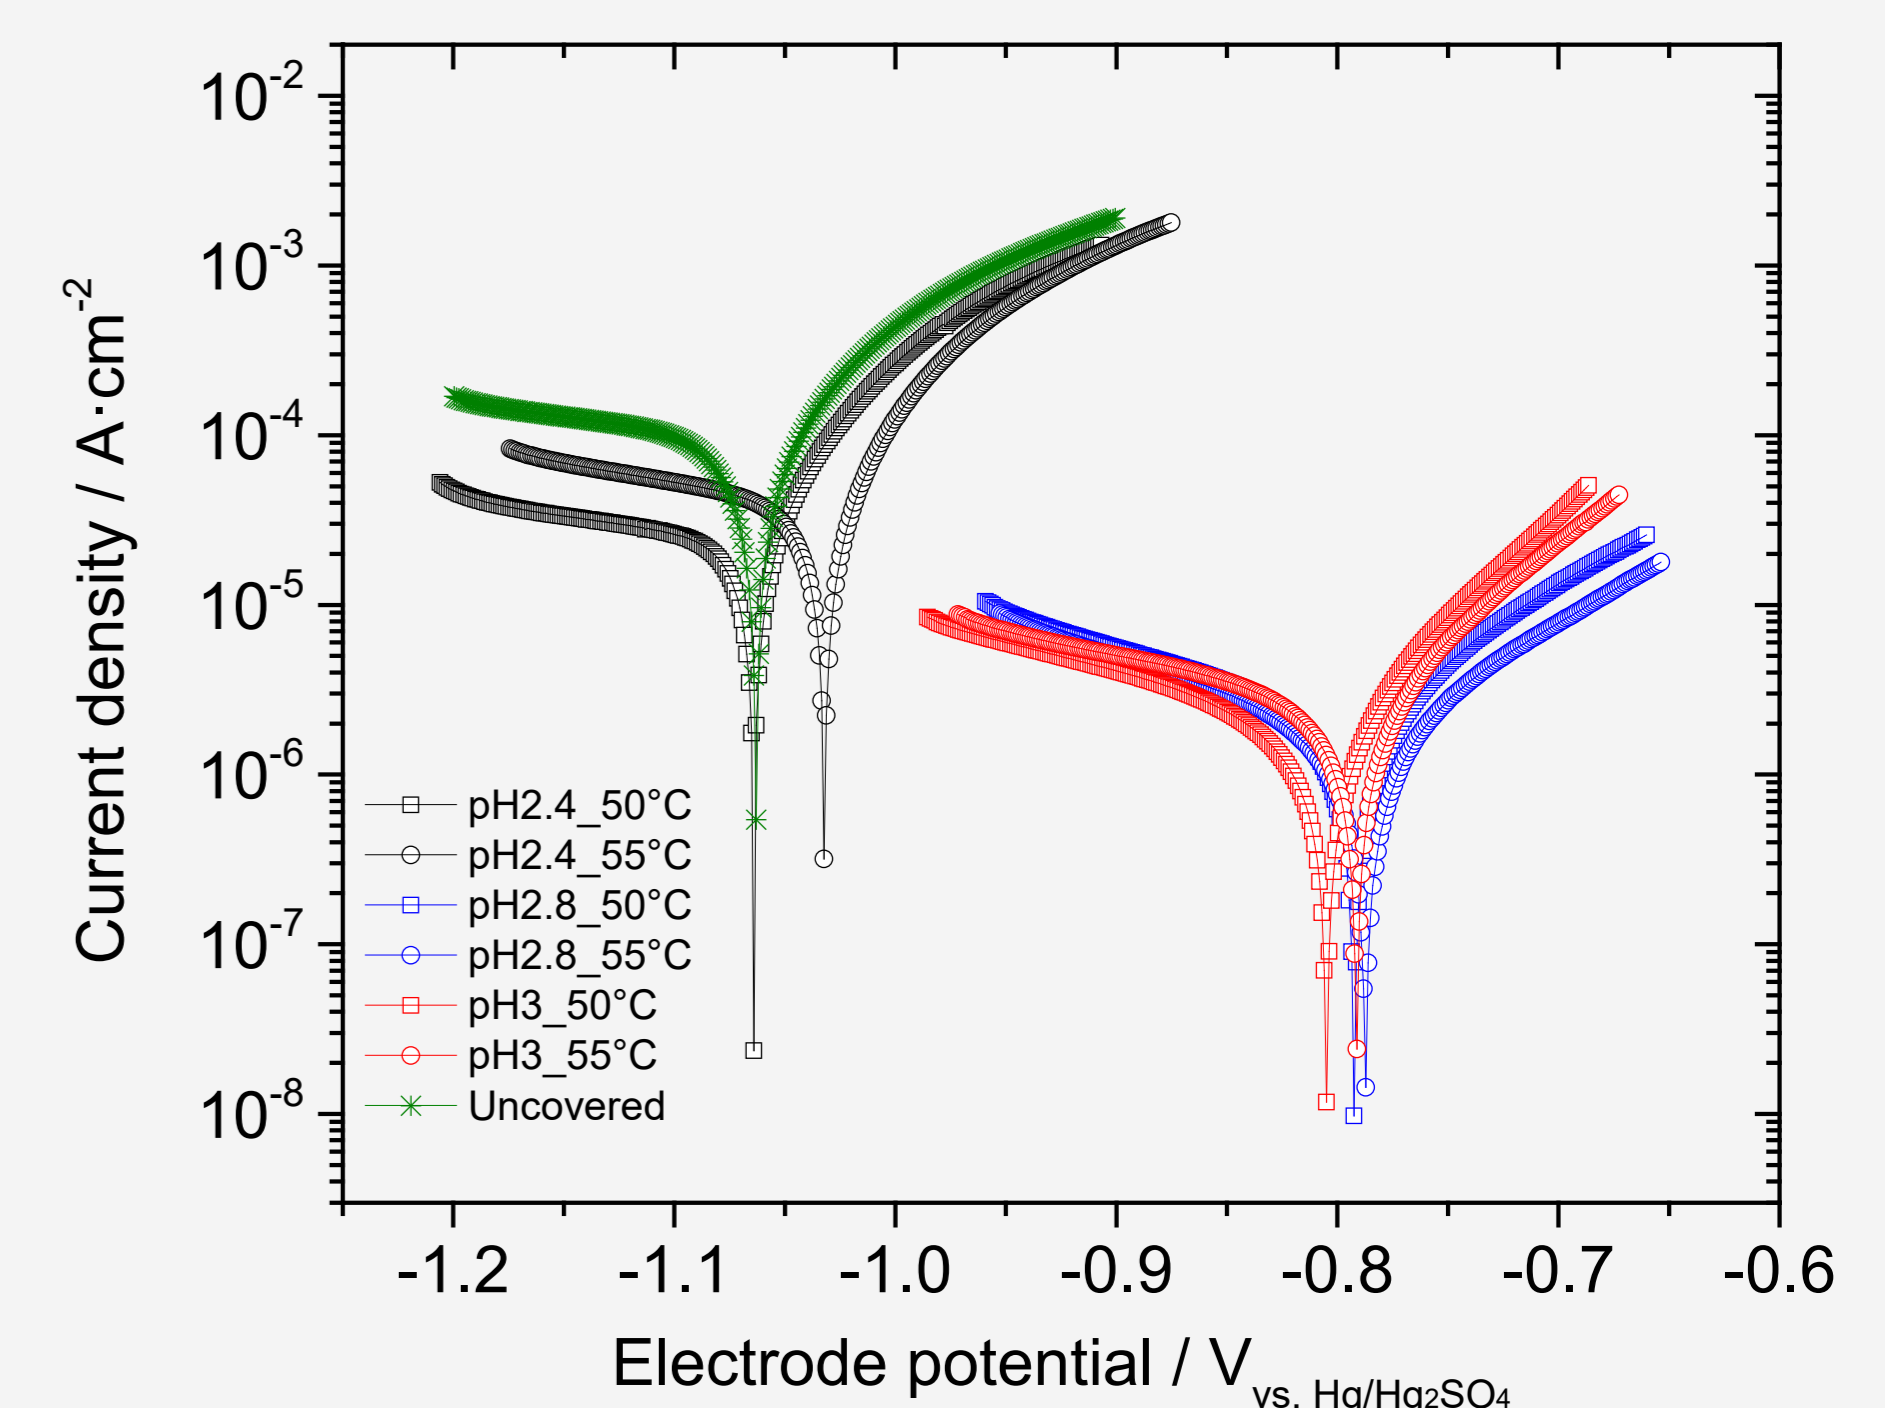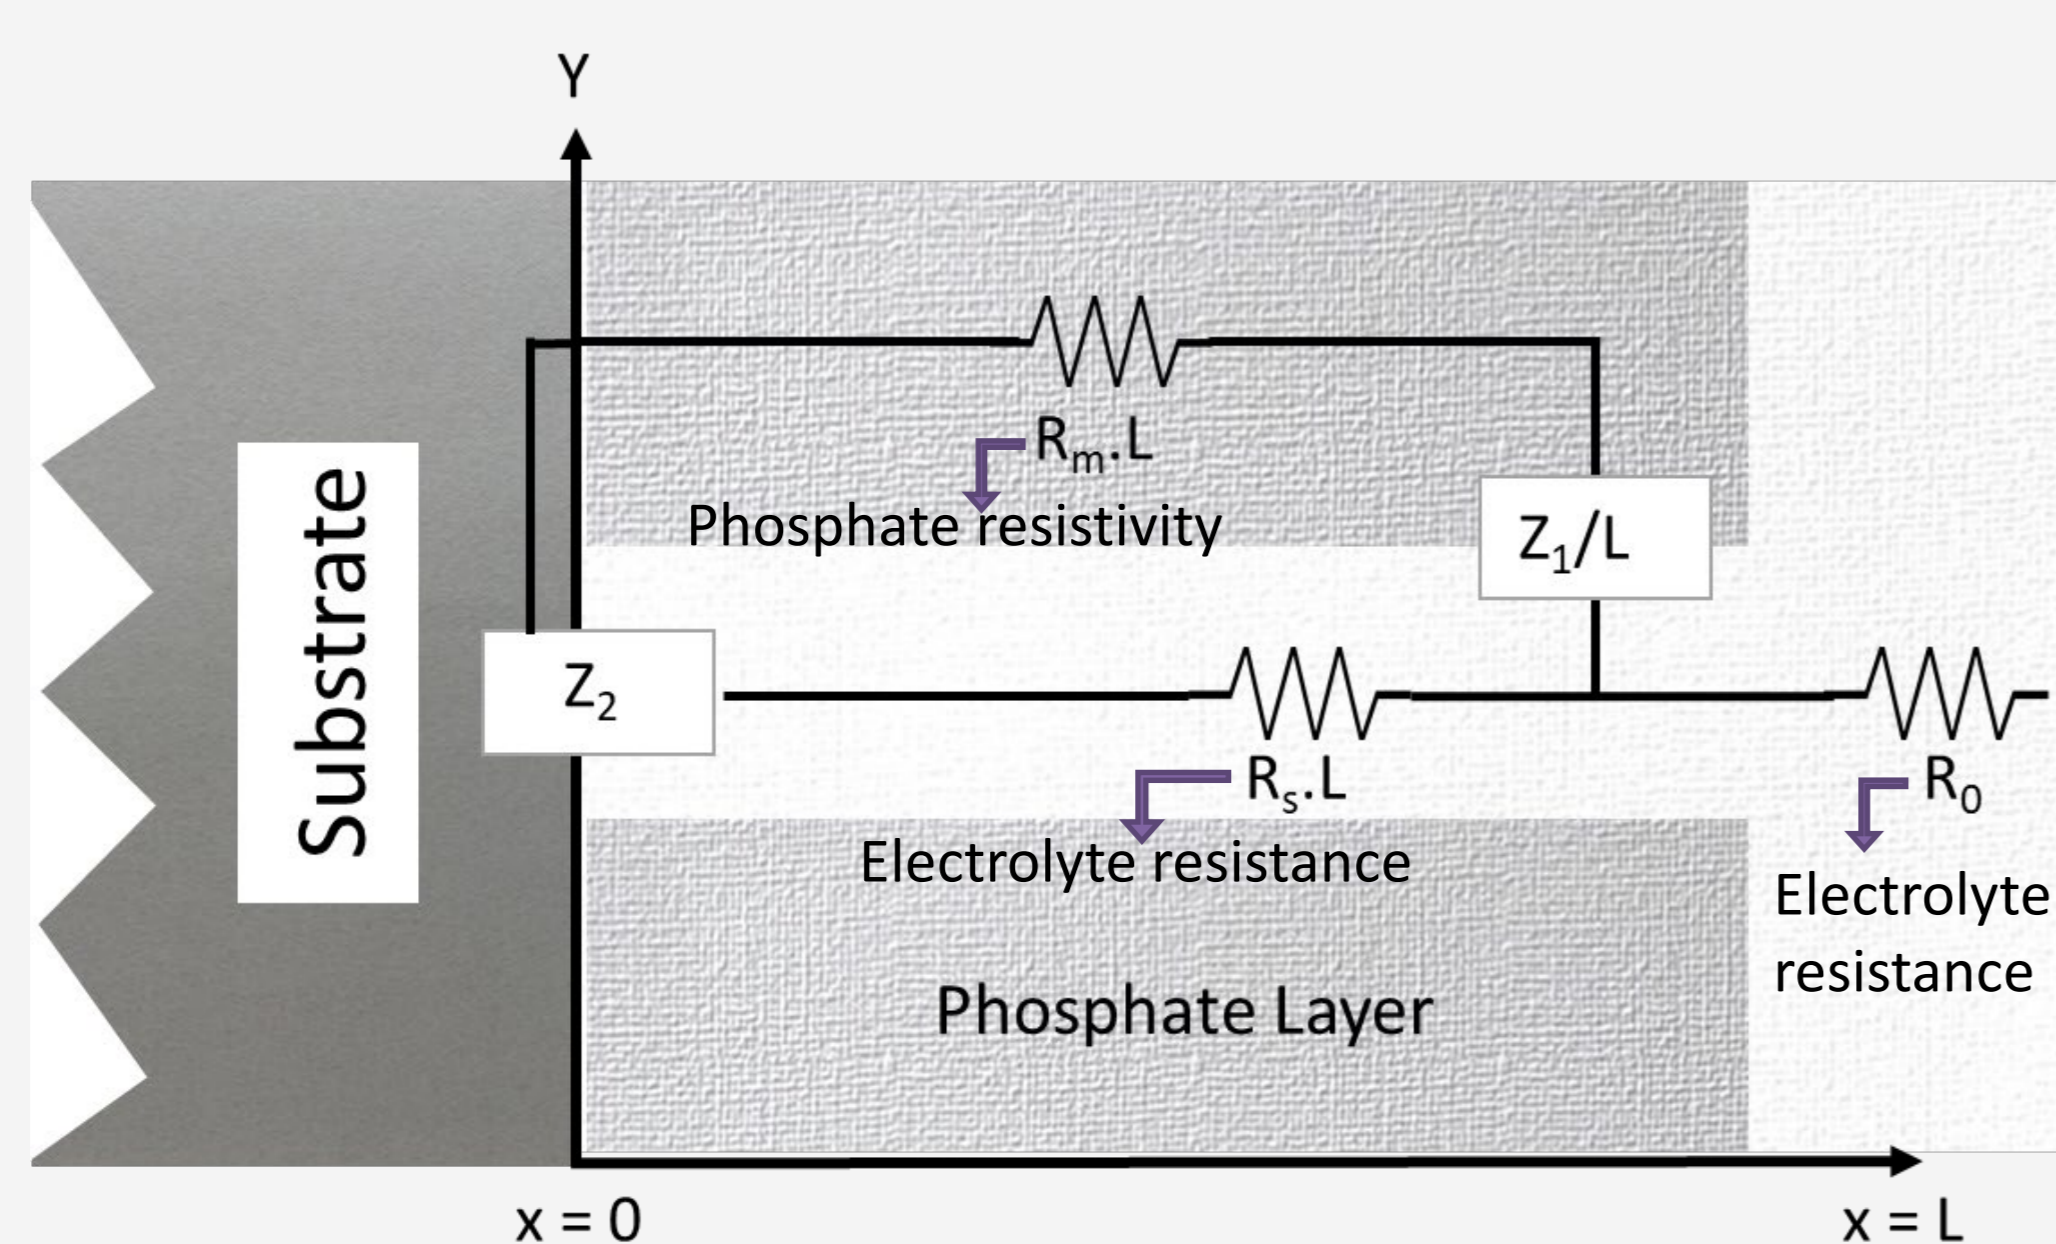

|       | pH 2.4                                                                                               | pH 3                                                                                                  |
|-------|------------------------------------------------------------------------------------------------------|-------------------------------------------------------------------------------------------------------|
| 55 °C | R <sub>m</sub> : 67.6 kΩ.cm<br>R <sub>s</sub> : 82.5 kΩ.cm<br>R <sub>2</sub> : 440 Ω.cm <sup>2</sup> | R <sub>m</sub> : 114 kΩ.cm<br>R <sub>s</sub> : 49.5 kΩ.cm<br>R <sub>2</sub> : 42.8 kΩ.cm <sup>2</sup> |
| 75 °C | R <sub>m</sub> : 316 kΩ.cm<br>R <sub>s</sub> : 232 kΩ.cm<br>R <sub>2</sub> : 1.3 kΩ.cm <sup>2</sup>  | R <sub>m</sub> : 86.6 Ω.cm<br>R <sub>s</sub> : 118 kΩ.cm<br>R <sub>2</sub> : 498 Ω.cm <sup>2</sup>    |

- At low temperature, when the pH increases:
  - ↑ R<sub>2</sub>: ↓ porosity
  - ↑ R<sub>m</sub>: ↑ resistivity (↓ Zn/Fe)
  - ↑ R<sub>s</sub>: crystal refinement

- At high temperature when the pH increases:
  - ↓ R<sub>2</sub>: ↑ porosity
  - ↓ R<sub>m</sub>: ↓ resistivity (↓ Zn/Fe but more porous)
  - ↑ R<sub>s</sub>: crystal refinement

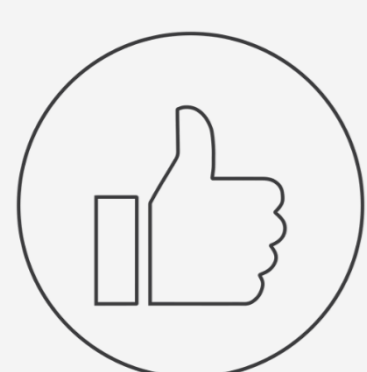

Impedance spectroscopy allows obtaining the following properties:

- Porosity
- Coating resistivity
- Crystal size

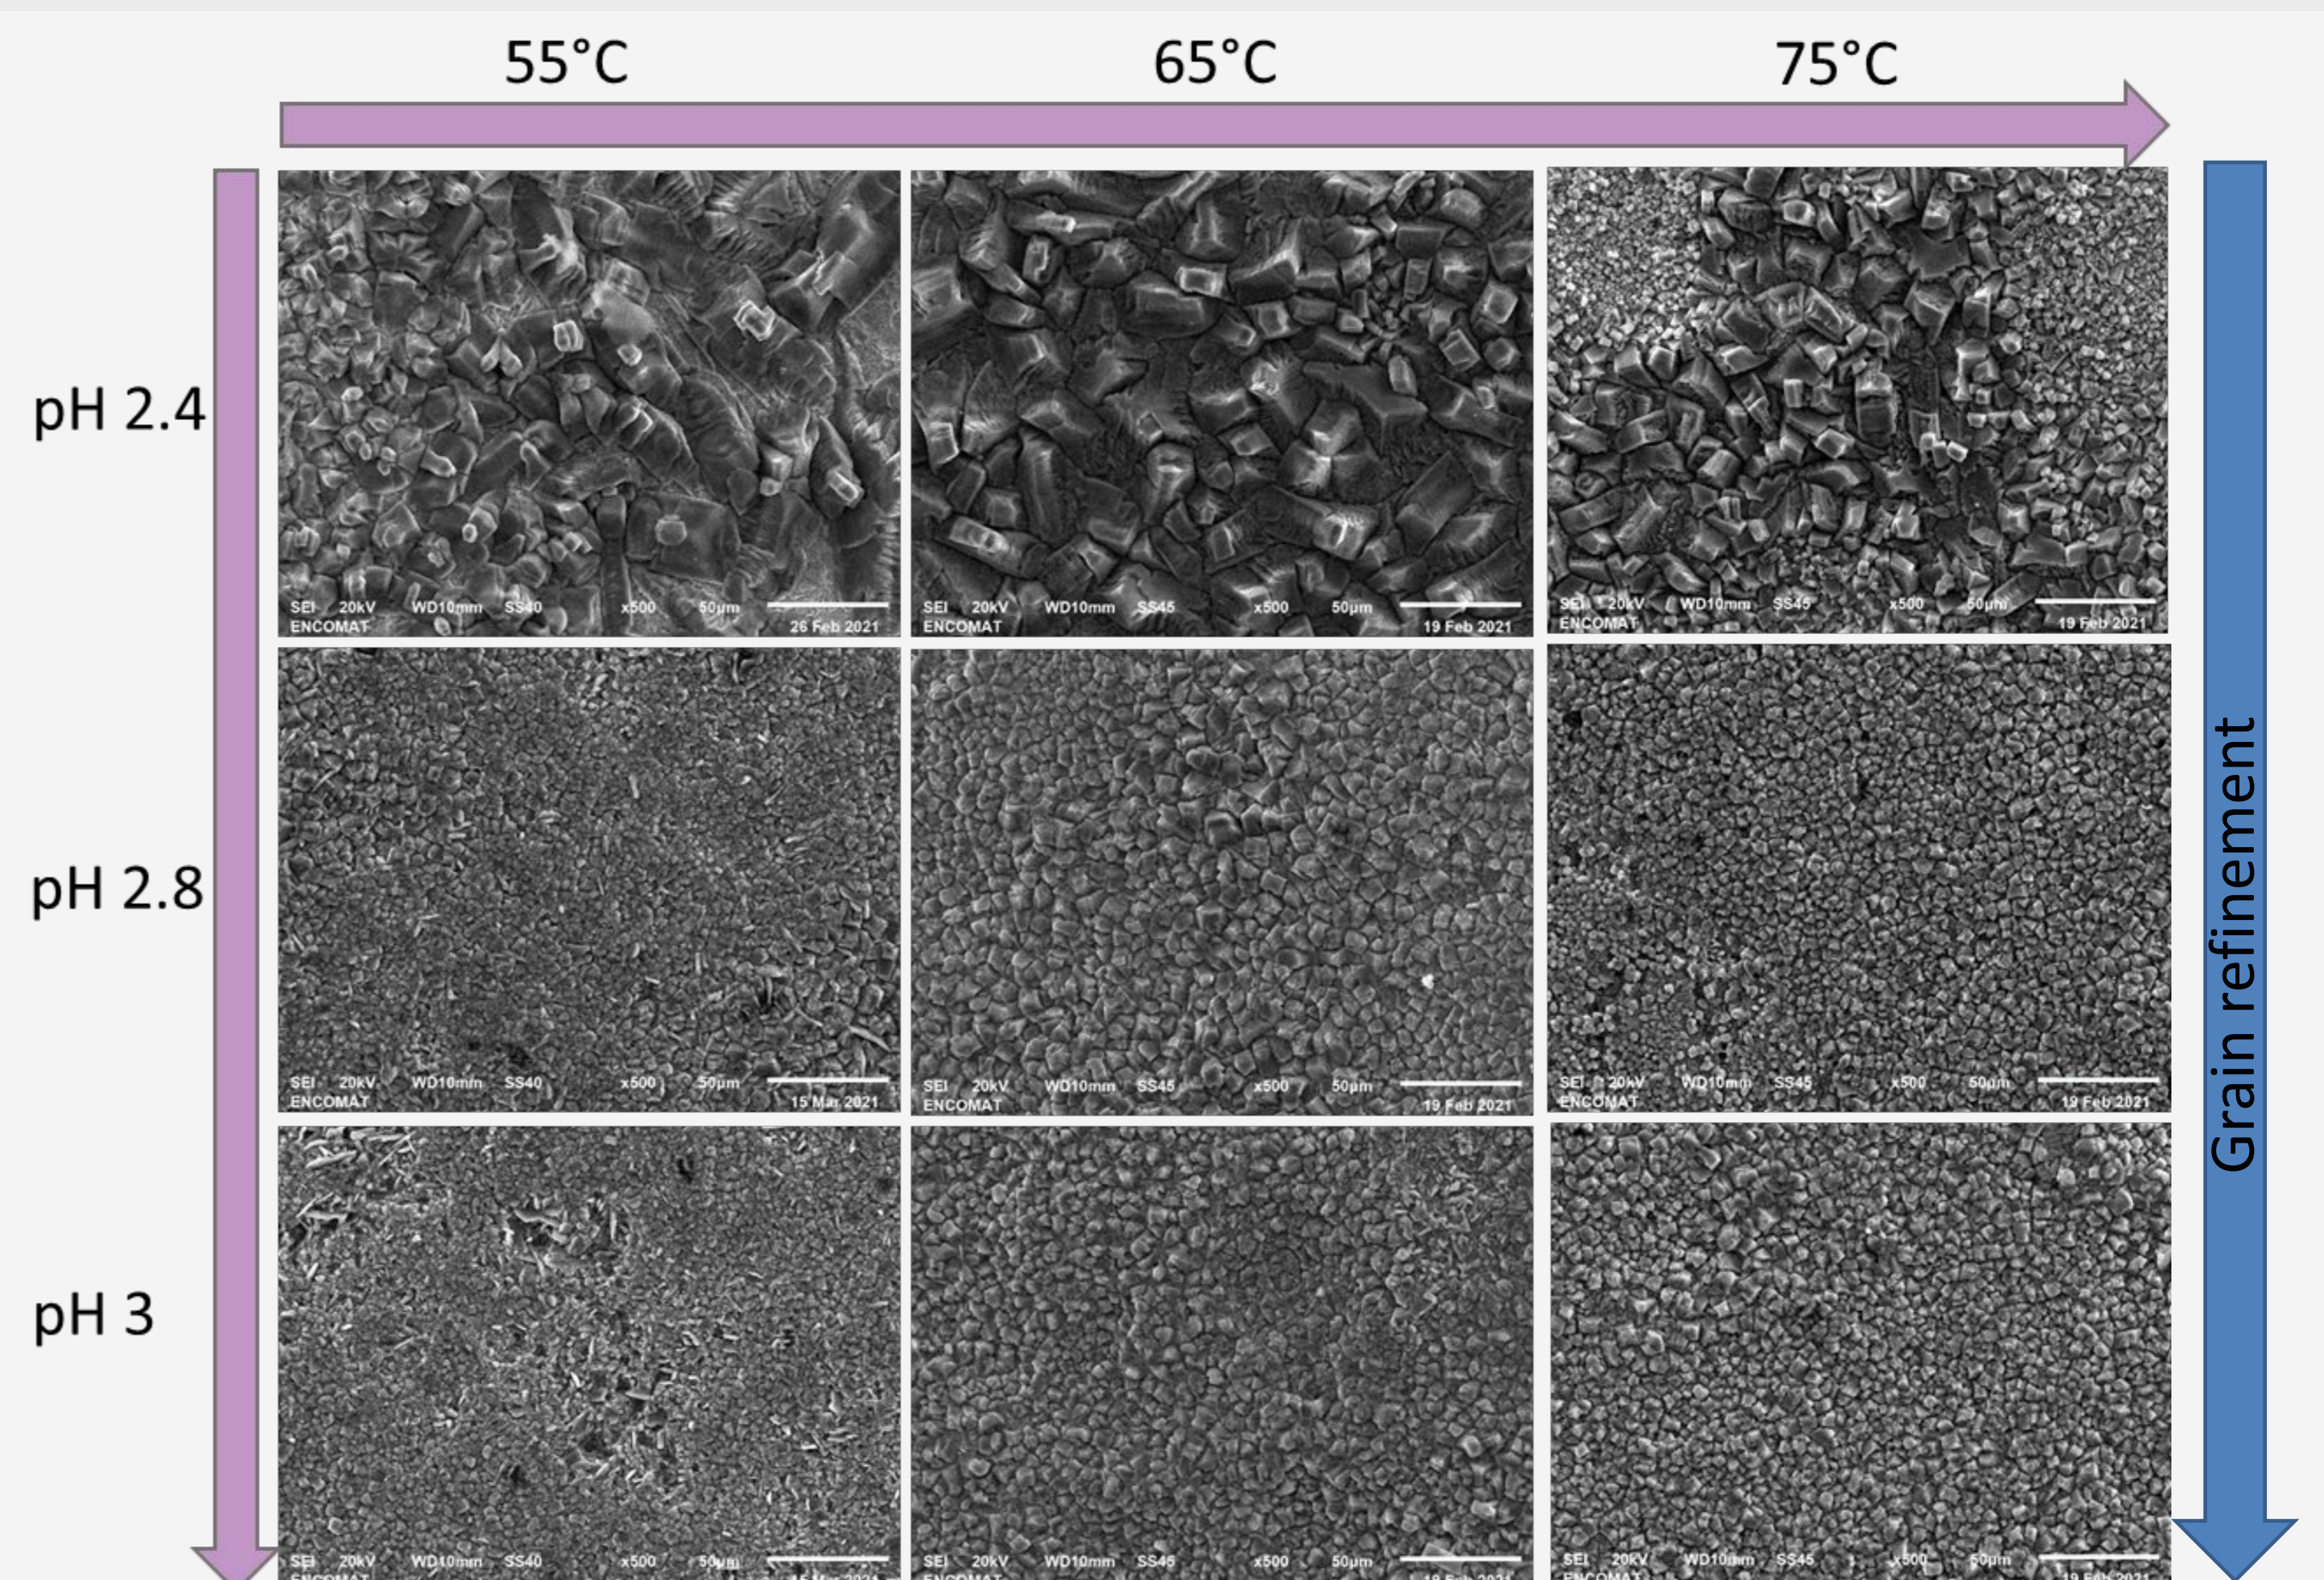

|        | Zn/Fe ratio |       |       |       |       |       |
|--------|-------------|-------|-------|-------|-------|-------|
|        | 50 °C       | 55 °C | 60 °C | 65 °C | 70 °C | 75 °C |
| pH 2.4 | 0.74        | 0.85  | 0.91  | 1.06  | 0.98  | 0.94  |
| pH 2.8 | 0.79        | 0.53  | 0.60  | 1.05  | 1.03  | 0.68  |
| pH 3   | 0.73        | 0.51  | 0.63  | 0.69  | 0.70  | 0.70  |

The higher the pH, the lower the Zn/Fe ratio

The higher the temperature, the higher the Zn/Fe ratio (maximum at 65 °C)

## 3. CONCLUSIONS

The experimental methodology employed allows a complete coating characterization, including the porosity and significant parameters such as the film resistivity or the crystal size:

- The films grown at the higher pH values are less conductive and have a lower crystal size
- Thicker coatings with an increased Zn content are developed at the lowest pH
- According to the obtained data, in order to achieve a low porosity, temperature as high as 75 °C is not recommended

In a further study, the coating alkaline stability along with the wear resistance must be assessed to conclude on the above-referred findings.

## 4. REFERENCES

- Díaz, B.; Freire, L.; Mojó, M.; Nóvoa, X. R. Optimization of Conversion Coatings Based on Zinc Phosphate on High Strength Steels, with Enhanced Barrier Properties. *J. Electroanal. Chem.* 2015, 737, 174–183. <https://doi.org/10.1016/j.jelechem.2014.06.035>.
- Abdalla, K.; Rahmat, A.; Azizan, A. The Effect of PH on Zinc Phosphate Coating Morphology and Its Corrosion Resistance on Mild Steel, *Advanced Materials Research*; 2013; Vol. 626, pp 569–574. <https://doi.org/10.4028/www.scientific.net/AMR.626.569>.
